# Supplementary material
Source: MDPI journal article supplement (https://www.mdpi.com/2073-4344/7/12/354)

**2b**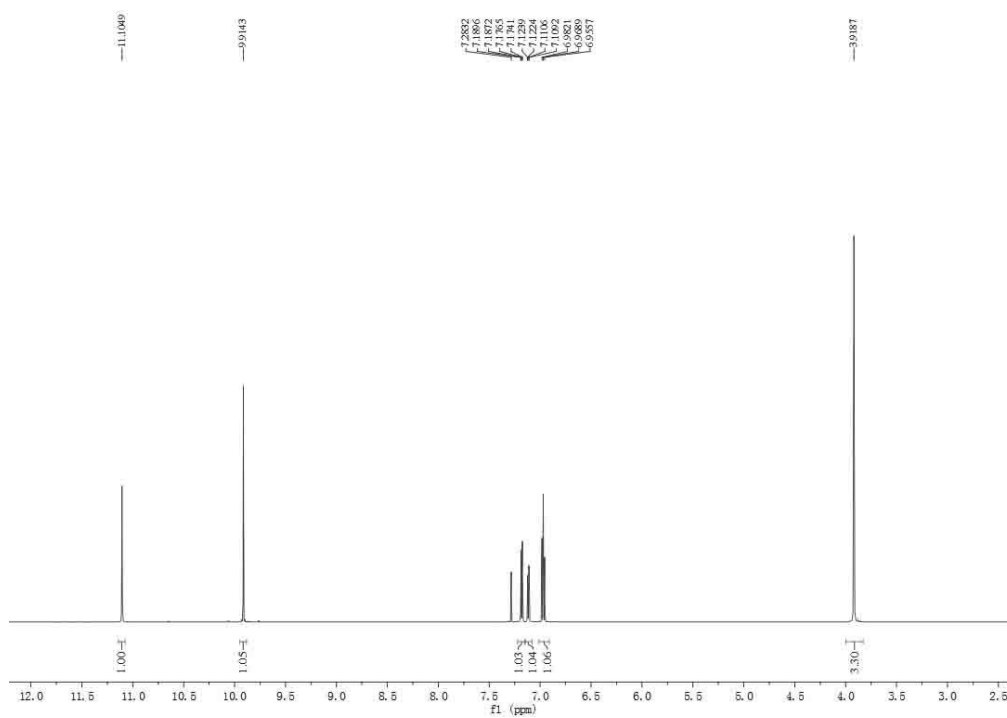**2c**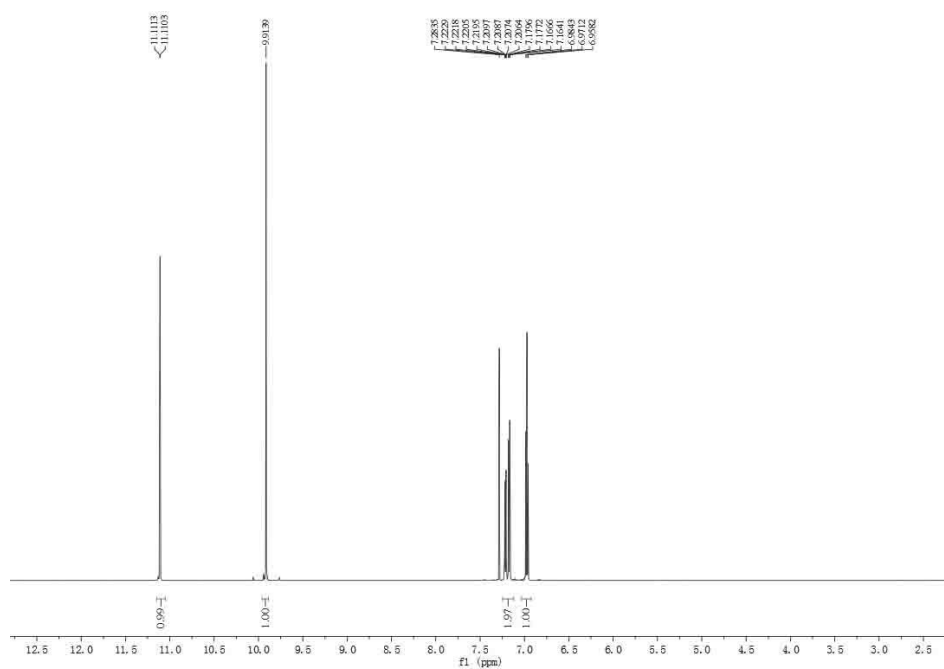

**2d**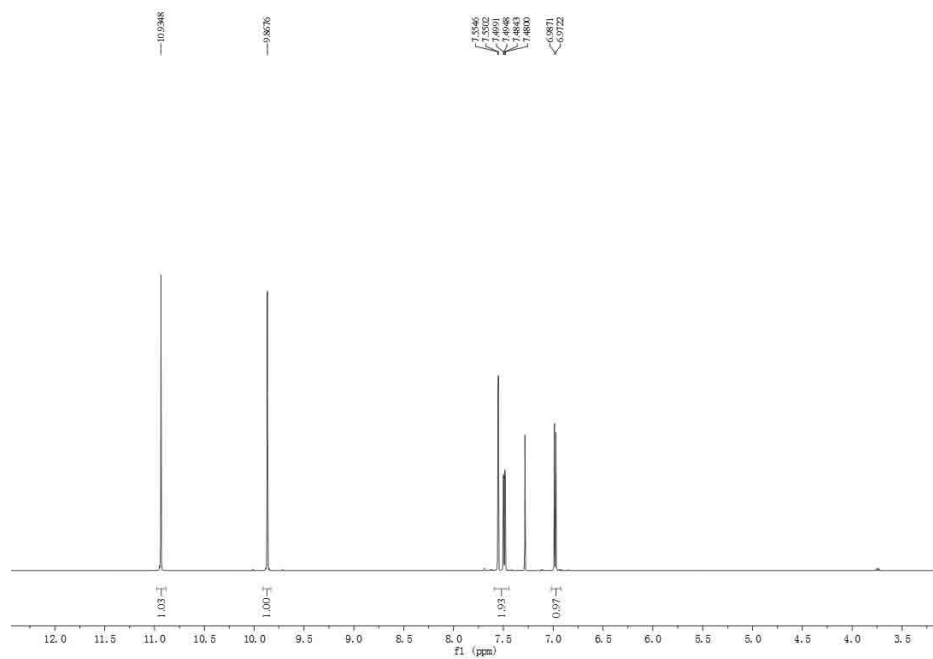**2e**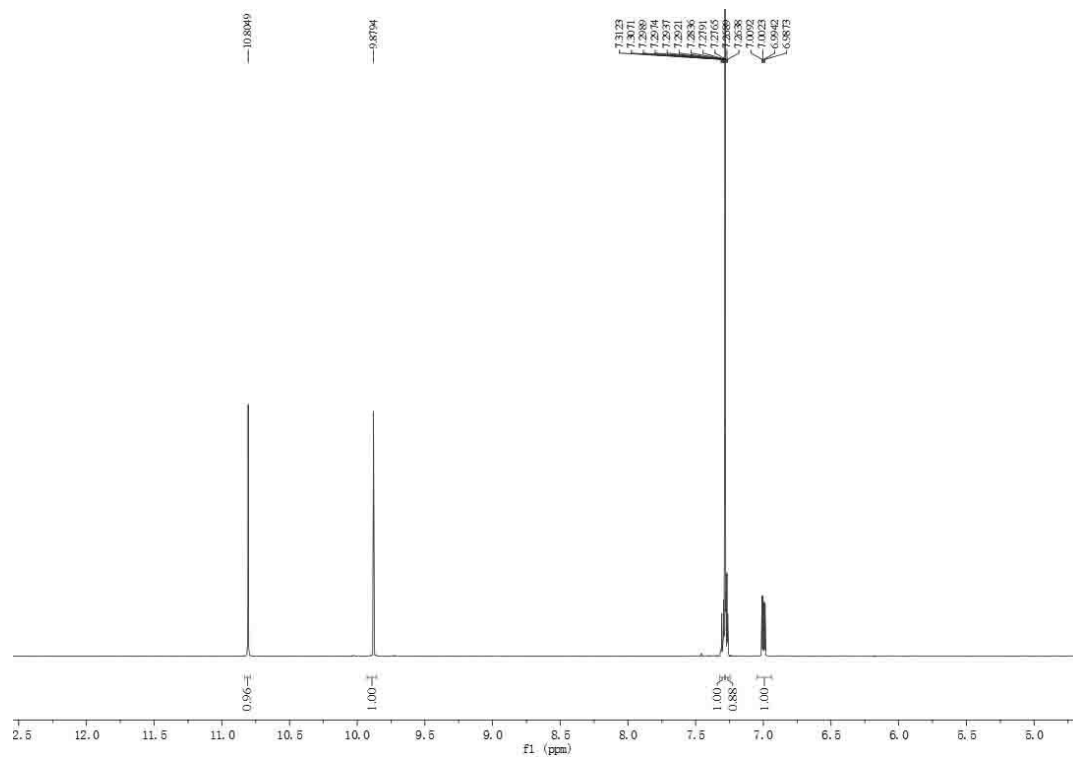

**2f**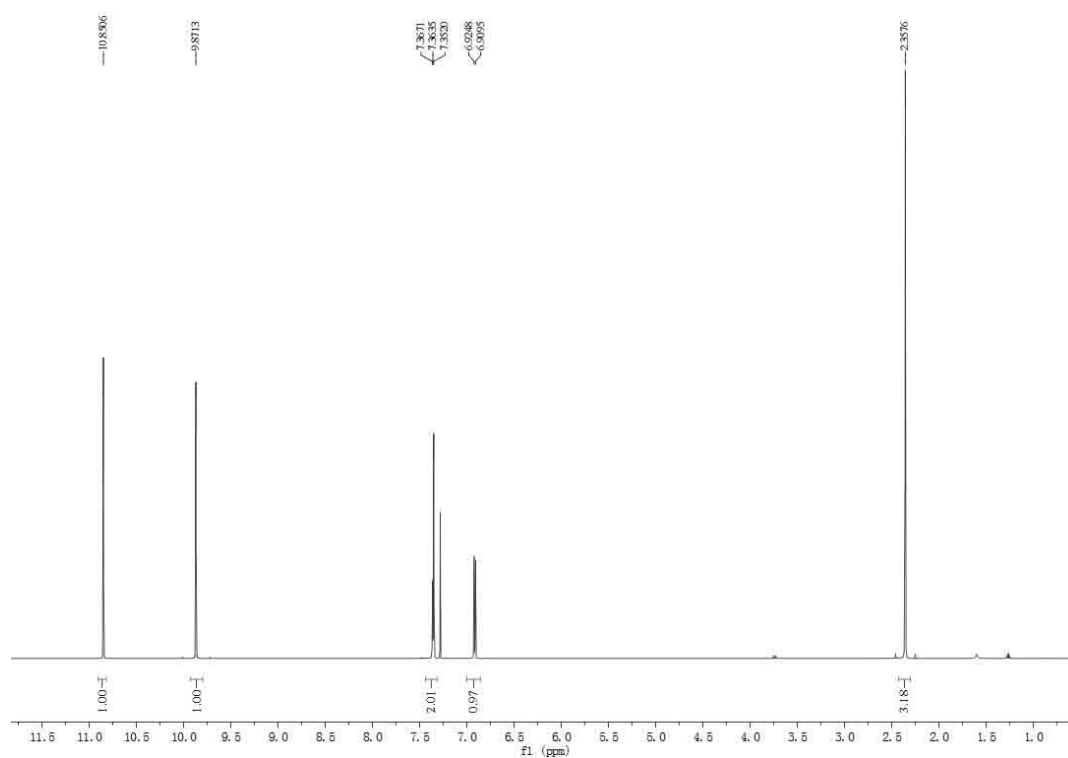**2g**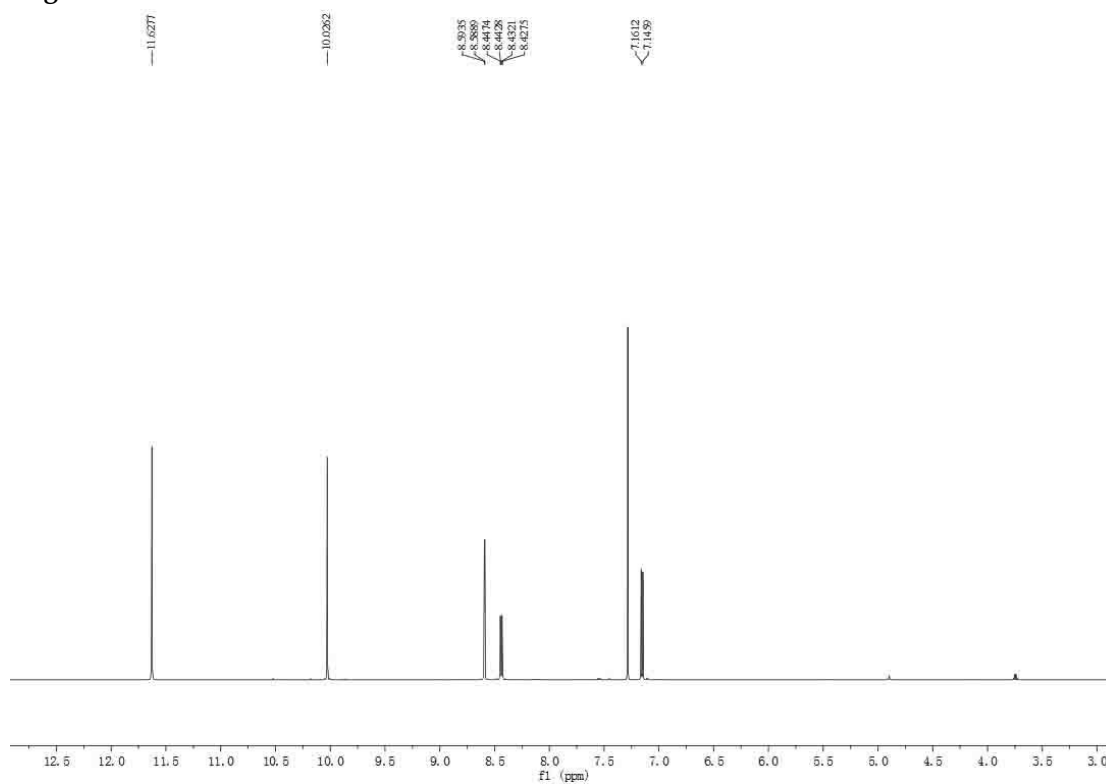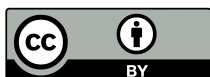

Supplement: s1 [file s1]
